# Supplementary material
Source: PubMed Central journal article supplement (PMC2000697)

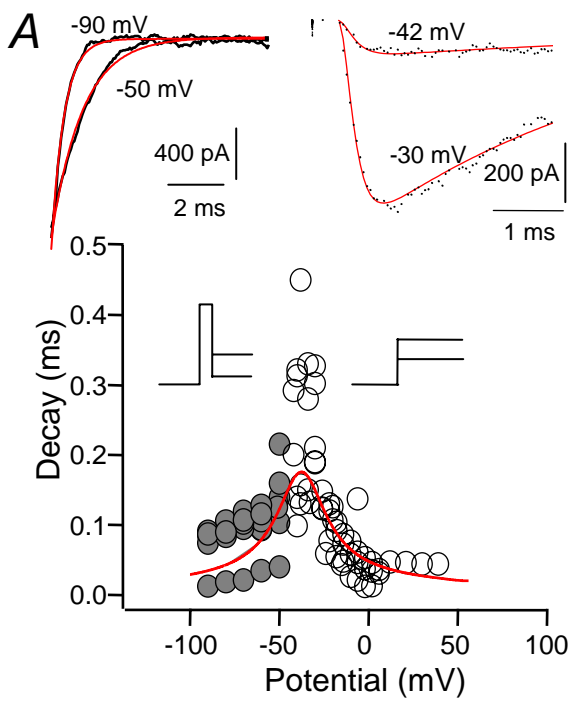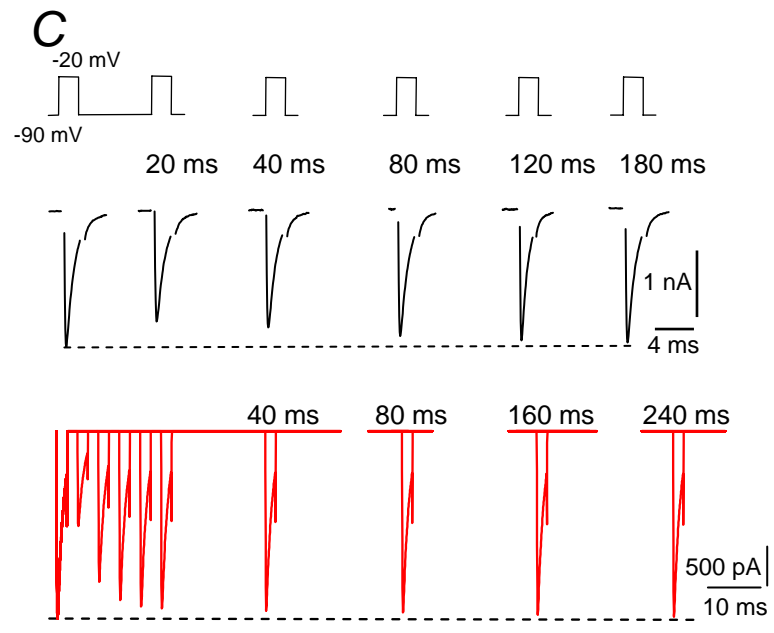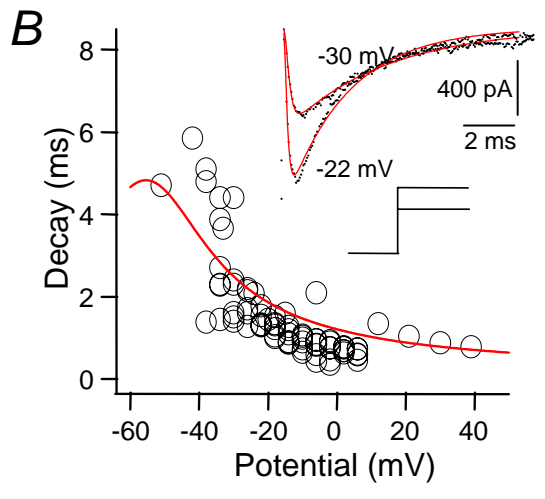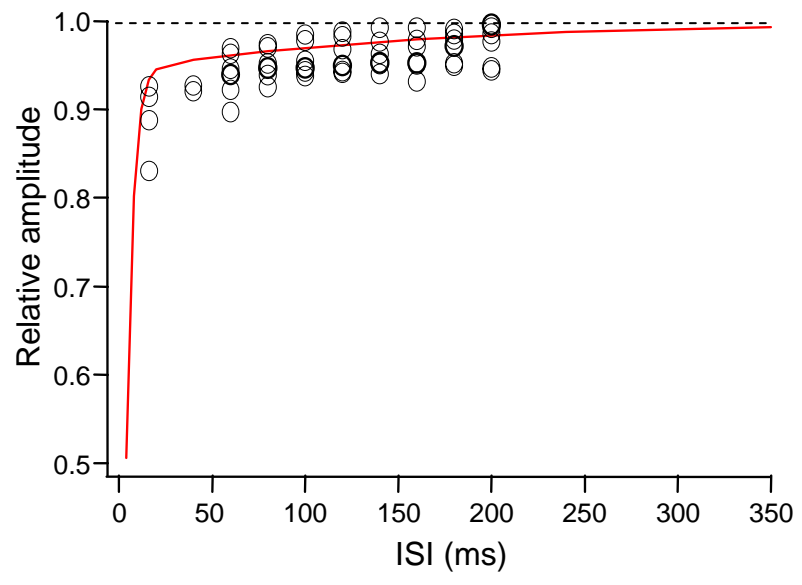

Suppl. Fig. 1

Supplement: jphysiol_2006.118026_1.pdf [file jphysiol_2006.118026_1.pdf]

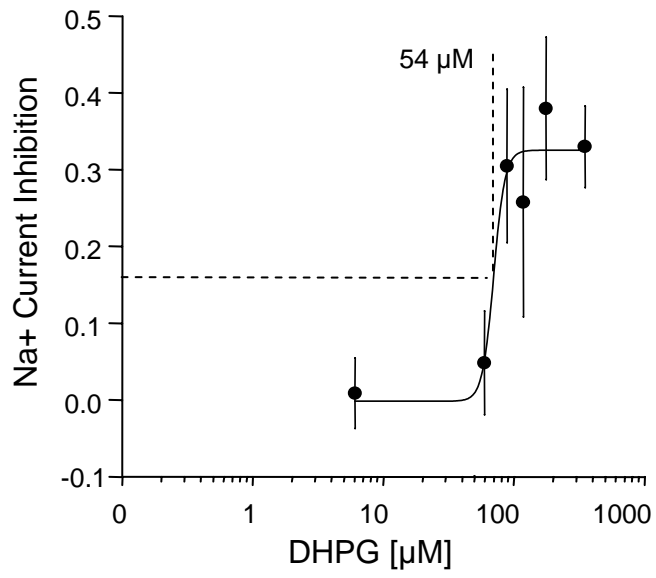

Supplement: jphysiol_2006.118026_2.pdf [file jphysiol_2006.118026_2.pdf]
